# Supplementary material for: Effects of Antiplatelet Drugs on Platelet-Dependent Coagulation Reactions
Source: MDPI journal article supplement (doi:10.3390/biom13071124), 2023-07-14
Supplement: s1 [file s1]

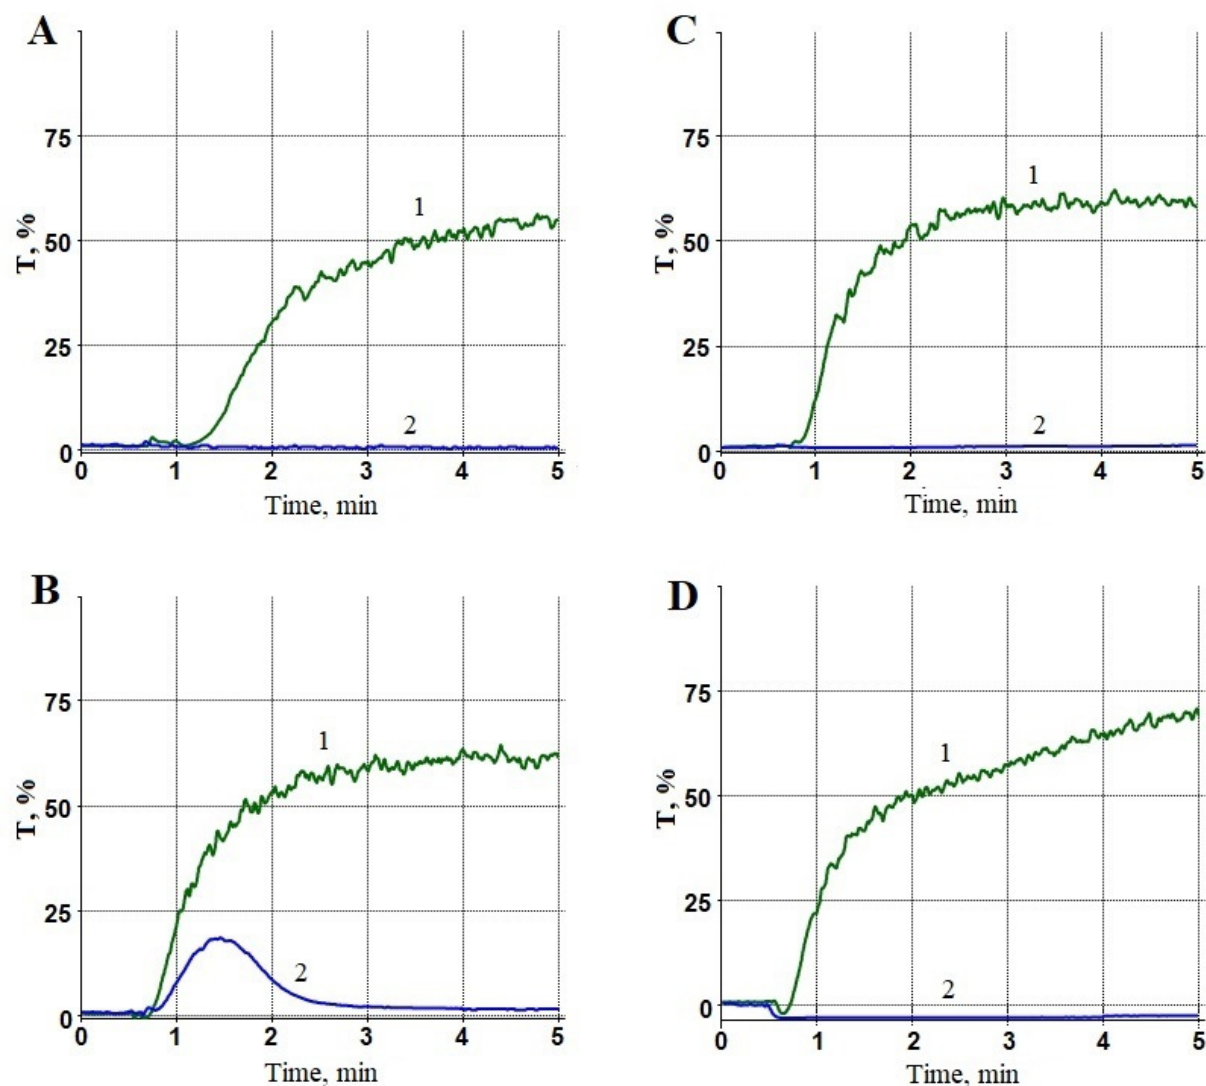

Suppl. Fig. S1. Inhibition of platelet aggregation in PRP by antiplatelet drugs. Light transmission aggregometry. PRP was preincubated without addition of any drugs (curves 1, green) or in the presence of 0.2 mM ASA (A), 1  $\mu$ M ticagrelor (B), 1  $\mu$ g/ml PGE1 (C) or 20  $\mu$ g/ml ruciomab (D) (curves 2, blue). Platelet aggregation was induced by 1 mM arachidonic acid (A), 10  $\mu$ M ADP (B), or 20  $\mu$ M TRAP (C and D). Agonists were added at 30 sec after starting registration.
